# Supplementary material for: Compressed Brown Algae as a Potential Environmental Enrichment Material in Growing Pigs
Source: MDPI journal article supplement (doi:10.3390/ani11020315), 2021-01-27
Supplement: s1 [file s1]

**Supplementary Table 1.** Algae material composition given by the manufacturer (Algopack, Saint-Malo, France). The material is made with *Saccharina latissimi*, a brown macroalgae, post-harvest dried and compressed.

---

|                                                 |
|-------------------------------------------------|
| Average chemical composition                    |
| Dry matter (on fresh weight): 10 - 30 %.        |
| Mineral matter (on dry matter): 14 - 34%.       |
| Carbohydrates (on dry matter): 45 - 65%.        |
| Proteins (on dry matter): 5 - 13%.              |
| Lipids (on dry matter): 0.5 - 2%.               |
| Organic matter (average in % of dry matter)     |
| Alginic acid: 25 to 32                          |
| Laminarine: 4 to 14                             |
| Mannitol: 8 to 13                               |
| Cellulosic material: 7.5 to 8                   |
| Mineral materials (average in % of dry matter)  |
| Sodium: 3.9 to 5                                |
| Potassium: 2 to 3.5                             |
| Nitrogen: 2.2                                   |
| Sulfur: 1.5 to 3                                |
| Calcium: 1 to 2                                 |
| Magnesium: 1                                    |
| Phosphorus: 0.35                                |
| Trace elements (average in mg/kg of dry matter) |
| Iodine: 700 to 5000                             |
| Iron: 45 to 600                                 |
| Zinc: 38 to 108                                 |
| Nickel: 3 to 7                                  |
| Copper: 5 to 6                                  |
| Manganese: 1                                    |
| Cobalt: 2                                       |

---
